# Supplementary material for: Controlling the localization of nanoparticles in assemblies of amphiphilic diblock copolymers
Source: Royal Society of Chemistry journal article supplement (doi:10.1039/c4sm01446d), 2014-01-01
Supplement: c4sm01446d1.pdf [file c4sm01446d1.pdf]

## Electronic Supplementary Information

# Controlling the Localization of Nanoparticles in Assemblies of Amphiphilic Diblock Copolymers

Shiying Ma<sup>a,b</sup>, Dongliang Qi<sup>a</sup>, Mengying Xiao<sup>a</sup>, Rong Wang<sup>\*,a</sup>

<sup>a</sup> Key Laboratory of High Performance Polymer Materials and Technology of Ministry of Education, Department of Polymer Science and Engineering, State Key Laboratory of Coordination Chemistry, School of Chemistry and Chemical Engineering, Nanjing National Laboratory of Microstructures, Nanjing University, Nanjing 210093, China

<sup>b</sup> College of Chemistry and Chemical Engineering, Taishan University, Taian 271021, China

### Supporting Information

Figure S1 Conservative energy of the diblock copolymer tethered nanoparticles versus simulation time with different  $a_{PA}$  and  $a_{PB}$ .

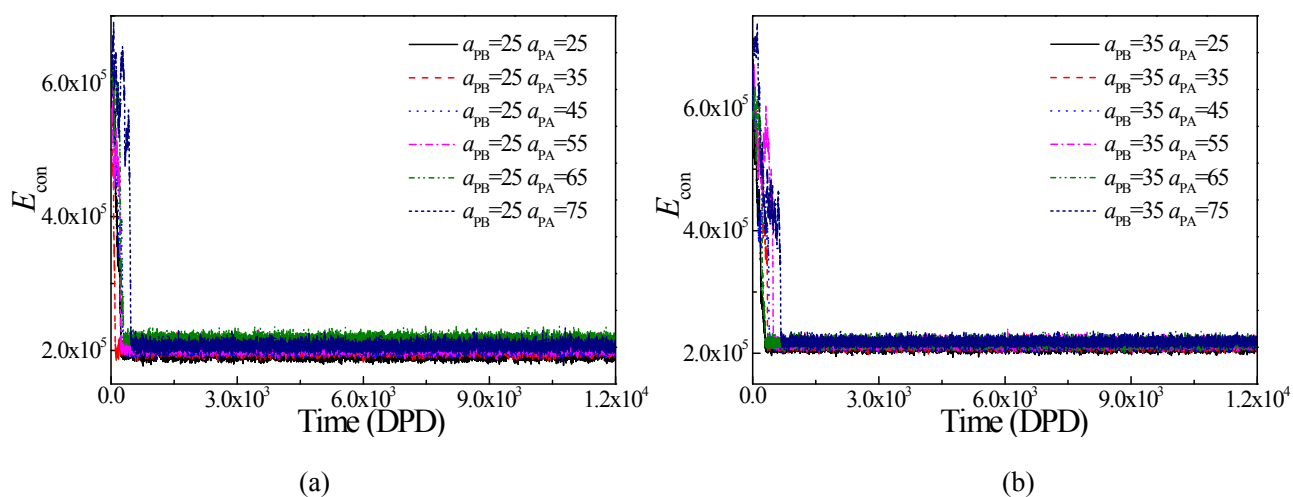

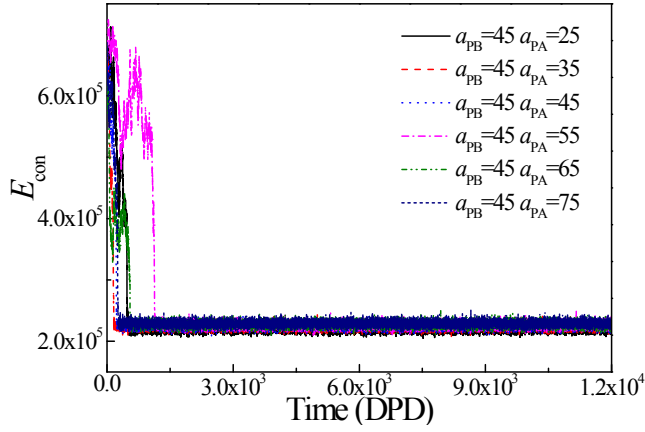

(c)

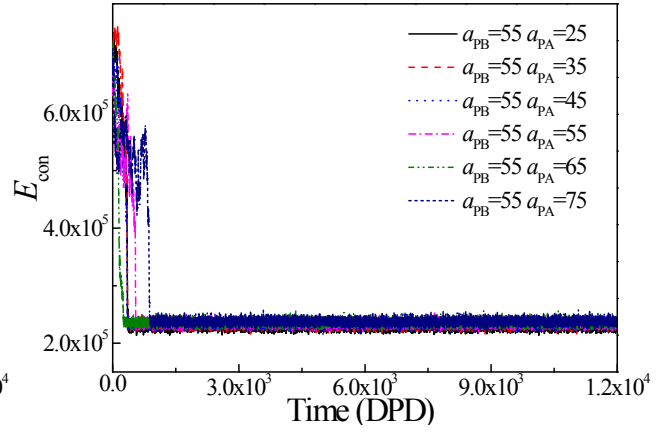

(d)

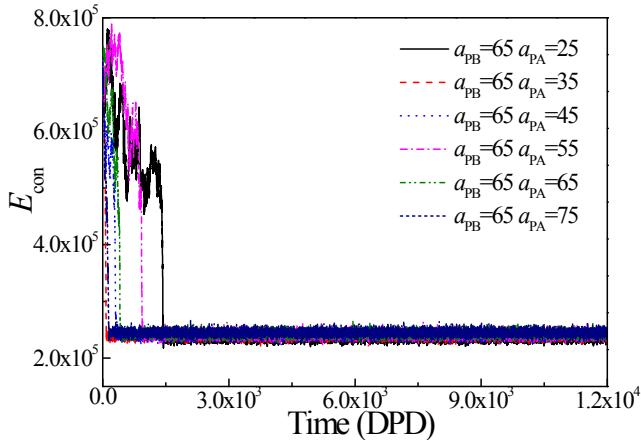

(e)

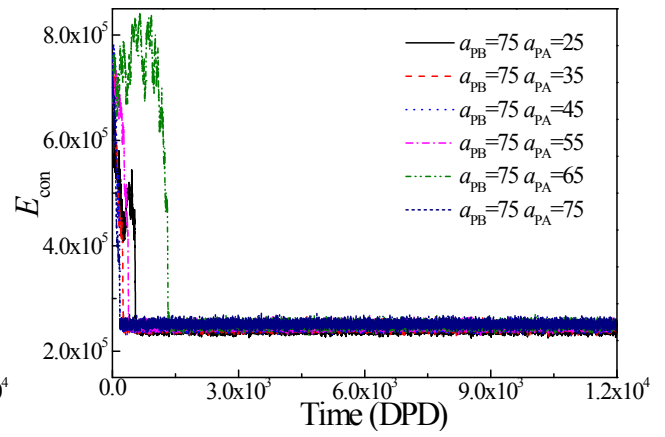

(f)

Table S1 The aggregation number of the aggregates in different size box with different  $a_{PA}$  and  $a_{PB}$  as the system reaches equilibrium.

| $a_{ij}$                | $L^3=25^3$     | $L^3=30^3$        |
|-------------------------|----------------|-------------------|
| $a_{PB}=25$ $a_{PA}=25$ | 191, 43        | 182,160,63        |
| $a_{PB}=25$ $a_{PA}=35$ | 90, 81, 63     | 175,103,83,44     |
| $a_{PB}=25$ $a_{PA}=45$ | 212, 22        | 123,119,72,68, 23 |
| $a_{PB}=25$ $a_{PA}=55$ | 124, 110       | 180,139,55,20,11  |
| $a_{PB}=25$ $a_{PA}=65$ | 120, 114       | 165,142,70,28     |
| $a_{PB}=25$ $a_{PA}=75$ | 91,52,44,33,14 | 145,111,72,54,23  |
| $a_{ij}$                | $L^3=25^3$     | $L^3=30^3$        |

|                       |             |                      |
|-----------------------|-------------|----------------------|
| $a_{PB}=35 a_{PA}=25$ | 85,75,74    | 133,106,79,75,12     |
| $a_{PB}=35 a_{PA}=35$ | 202,32      | 91,79,68,68,51,35,13 |
| $a_{PB}=35 a_{PA}=45$ | 76,68,62,28 | 198,81,50,33,27,16   |
| $a_{PB}=35 a_{PA}=55$ | 214,20      | 169,80,56,40,28,25,7 |
| $a_{PB}=35 a_{PA}=65$ | 164,70      | 283,90,32            |
| $a_{PB}=35 a_{PA}=75$ | 234         | 180,111,43,37,34     |

| $a_{ij}$              | $L^3=25^3$ | $L^3=30^3$         |
|-----------------------|------------|--------------------|
| $a_{PB}=45 a_{PA}=25$ | 173,44,17  | 243,119,43         |
| $a_{PB}=45 a_{PA}=35$ | 116,74,44  | 231,63,63,48       |
| $a_{PB}=45 a_{PA}=45$ | 143,91     | 172,84,60,36,28,25 |
| $a_{PB}=45 a_{PA}=55$ | 131,55,48  | 216,76,55,38,20    |
| $a_{PB}=45 a_{PA}=65$ | 181,53     | 174,72,66,58,35    |
| $a_{PB}=45 a_{PA}=75$ | 234        | 264,60,59,22       |

| $a_{ij}$              | $L^3=25^3$   | $L^3=30^3$       |
|-----------------------|--------------|------------------|
| $a_{PB}=55 a_{PA}=25$ | 117,62,35,20 | 161,117,79,28,11 |
| $a_{PB}=55 a_{PA}=35$ | 186,29,19    | 312,93           |
| $a_{PB}=55 a_{PA}=45$ | 175,59       | 139,90,76,68,32  |
| $a_{PB}=55 a_{PA}=55$ | 118,116      | 225,177,3        |
| $a_{PB}=55 a_{PA}=65$ | 127,85,22    | 187,184,18,16    |
| $a_{PB}=55 a_{PA}=75$ | 160,74       | 175,104,91,35    |

| $a_{ij}$              | $L^3=25^3$   | $L^3=30^3$       |
|-----------------------|--------------|------------------|
| $a_{PB}=65 a_{PA}=25$ | 171,27,25,11 | 285,91,19,10     |
| $a_{PB}=65 a_{PA}=35$ | 192,42       | 315,54,36        |
| $a_{PB}=65 a_{PA}=45$ | 234          | 247,104,54       |
| $a_{PB}=65 a_{PA}=55$ | 234          | 103,103,89,82,28 |
| $a_{PB}=65 a_{PA}=65$ | 190,44       | 203,160,42       |

|                         |              |                 |
|-------------------------|--------------|-----------------|
| $a_{PB}=65$ $a_{PA}=75$ | 234          | 49,135,221      |
| $a_{ij}$                | $L^3=25^3$   | $L^3=30^3$      |
| $a_{PB}=75$ $a_{PA}=25$ | 127,107      | 293,93,19       |
| $a_{PB}=75$ $a_{PA}=35$ | 234          | 222,113,45,25   |
| $a_{PB}=75$ $a_{PA}=45$ | 170,26,23,15 | 211,117,77      |
| $a_{PB}=75$ $a_{PA}=55$ | 145,89       | 144,122,70,69   |
| $a_{PB}=75$ $a_{PA}=65$ | 106,66,62    | 161,86,67,60,31 |
| $a_{PB}=75$ $a_{PA}=75$ | 234          | 287,65,42,11    |

Table S2 Calculated the average mean square of the end-to-end distance of tethered copolymer chain and  $S_c$  with various  $a_{PA}$  as fixed  $a_{PB} = 25$

| $a_{PA}$ | $R_e^2$ | $S_c$ |
|----------|---------|-------|
| 25       | 1.483   | 1.111 |
| 35       | 1.532   | 1.129 |
| 45       | 1.555   | 1.137 |
| 55       | 1.576   | 1.145 |
| 65       | 1.590   | 1.150 |
| 75       | 1.595   | 1.152 |

Note: The  $R_{e0}^2$  of the tethered chain is 1.202.

Table S3 Calculated the average mean square of the end-to-end distance of tethered copolymer chain and  $S_c$  with various  $a_{PB}$  as fixed  $a_{PA} = 25$

| $a_{PB}$ | $R_e^2$ | $S_c$ |
|----------|---------|-------|
| 25       | 1.483   | 1.111 |
| 35       | 1.500   | 1.117 |
| 45       | 1.504   | 1.119 |
| 55       | 1.523   | 1.126 |
| 65       | 1.520   | 1.125 |

75                      1.529                      1.128

---

Note: The  $R_{e0}^2$  of the tethered chain is 1.202.

Table S4 Calculated the average mean square of the end-to-end distance of solvophobic block B and  $S_c$  with various  $a_{pA}$  and  $a_{pB}$

| $a_{pA}=a_{pB}$ | $R_e^2$ | $S_c$ |
|-----------------|---------|-------|
| 25              | 0.692   | 0.955 |
| 35              | 0.686   | 0.951 |
| 45              | 0.681   | 0.947 |
| 55              | 0.652   | 0.927 |
| 65              | 0.653   | 0.928 |
| 75              | 0.642   | 0.920 |

Note: The  $R_{e0}^2$  of the solvophobic B-block is 0.759.

Table S5 The Mode A number fraction of the obtained spherical micelle at  $t = 15000$  with different  $a_{pA}$  and  $a_{pB}$

|                         | $N_{agg}$ | $N_A$ | $N_B$ | $\Phi_A$ |
|-------------------------|-----------|-------|-------|----------|
| $a_{pB}=25$ $a_{pA}=25$ | 191       | 75    | 116   | 0.393    |
| $a_{pB}=25$ $a_{pA}=35$ | 43        | 17    | 26    | 0.395    |
| $a_{pB}=25$ $a_{pA}=35$ | 81        | 35    | 46    | 0.432    |
| $a_{pB}=25$ $a_{pA}=35$ | 90        | 37    | 53    | 0.411    |
| $a_{pB}=25$ $a_{pA}=35$ | 63        | 27    | 36    | 0.428    |

Note:  $N_{agg}$  is the number of copolymer in one aggregate.  $N_A$  and  $N_B$  are the number of copolymer with Mode A and Mode B in the aggregate, respectively.  $\Phi_A$  is the number fraction of Mode A of the obtained aggregate.

Table S6 The Mode A number fraction of the obtained vesicle at  $t = 15000$  with different  $a_{pA}$  and  $a_{pB}$

|                         | $N_{agg}$ | $N_A$ | $N_B$ | $\Phi_A$ |
|-------------------------|-----------|-------|-------|----------|
| $a_{pB}=25$ $a_{pA}=55$ | 124       | 50    | 74    | 0.403    |
| $a_{pB}=25$ $a_{pA}=55$ | 110       | 46    | 64    | 0.418    |
| $a_{pB}=25$ $a_{pA}=65$ | 114       | 53    | 61    | 0.465    |

|                         |     |    |    |       |
|-------------------------|-----|----|----|-------|
| $a_{PB}=25$ $a_{PA}=65$ | 120 | 58 | 62 | 0.483 |
|-------------------------|-----|----|----|-------|

Note:  $N_{agg}$  is the number of copolymer in one aggregate.  $N_A$  and  $N_B$  are the number of copolymer with Mode A and Mode B in the aggregate, respectively.

Table S7 The Mode A number fraction of the obtained disk-like micelles at  $t = 15000$  with different  $a_{PA}$  and  $a_{PB}$

|                         | $N_{agg}$ | $N_A$ | $N_B$ | $\Phi_A$ |
|-------------------------|-----------|-------|-------|----------|
| $a_{PB}=35$ $a_{PA}=45$ | 76        | 0     | 76    | 0        |
| $a_{PB}=35$ $a_{PA}=45$ | 68        | 0     | 68    | 0        |
| $a_{PB}=35$ $a_{PA}=45$ | 62        | 0     | 62    | 0        |
| $a_{PB}=35$ $a_{PA}=55$ | 214       | 0     | 214   | 0        |
| $a_{PB}=45$ $a_{PA}=45$ | 143       | 0     | 143   | 0        |
| $a_{PB}=45$ $a_{PA}=45$ | 91        | 0     | 91    | 0        |

Note:  $N_{agg}$  is the number of copolymer in one aggregate.  $N_A$  and  $N_B$  are the number of copolymer with Mode A and Mode B in the aggregate, respectively.  $\Phi_A$  is the number fraction of Mode A of the obtained aggregate.

Table S8 The Mode A number fraction of the obtained rod-like micelle at  $t = 15000$  with different  $a_{PA}$  and  $a_{PB}$

|                         | $N_{agg}$ | $N_A$ | $N_B$ | $\Phi_A$ |
|-------------------------|-----------|-------|-------|----------|
| $a_{PB}=75$ $a_{PA}=25$ | 127       | 0     | 127   | 0        |
| $a_{PB}=75$ $a_{PA}=25$ | 107       | 0     | 107   | 0        |
| $a_{PB}=75$ $a_{PA}=65$ | 62        | 0     | 62    | 0        |
| $a_{PB}=75$ $a_{PA}=65$ | 66        | 0     | 66    | 0        |
| $a_{PB}=75$ $a_{PA}=65$ | 106       | 0     | 106   | 0        |

Note:  $N_{agg}$  is the number of copolymer in one aggregate.  $N_A$  and  $N_B$  are the number of copolymer with Mode A and Mode B in the aggregate, respectively.  $\Phi_A$  is the number fraction of Mode A of the obtained aggregate.
